# Supplementary material
Source: publisher site journal article supplement (https://www.spandidos-publications.com/3389/downloadSupplementary)

Figure S1. Representative confocal images of immunofluorescence staining. Staining in the (A) S group, (B) M group, (C) R group, (D) RA group and (E) MA group at 7 days after ischemia onset. White arrows indicate examples of colocalized cells. Red represents BrdU and Green represents DCX. (F) BrdU/DCX/DAPI co-staining in (C). Magnification x200; scale bar, 50  $\mu$ m. MCAO, middle cerebral artery occlusion model; rTMS, repetitive Transcranial Magnetic Stimulation; S, sham; M, MCAO; R, rTMS + MCAO; RA, rTMS + MCAO + AMD3100; MA, MCAO + AMD3100; BrdU, bromodeoxyuridine; DCX, doublecortin.

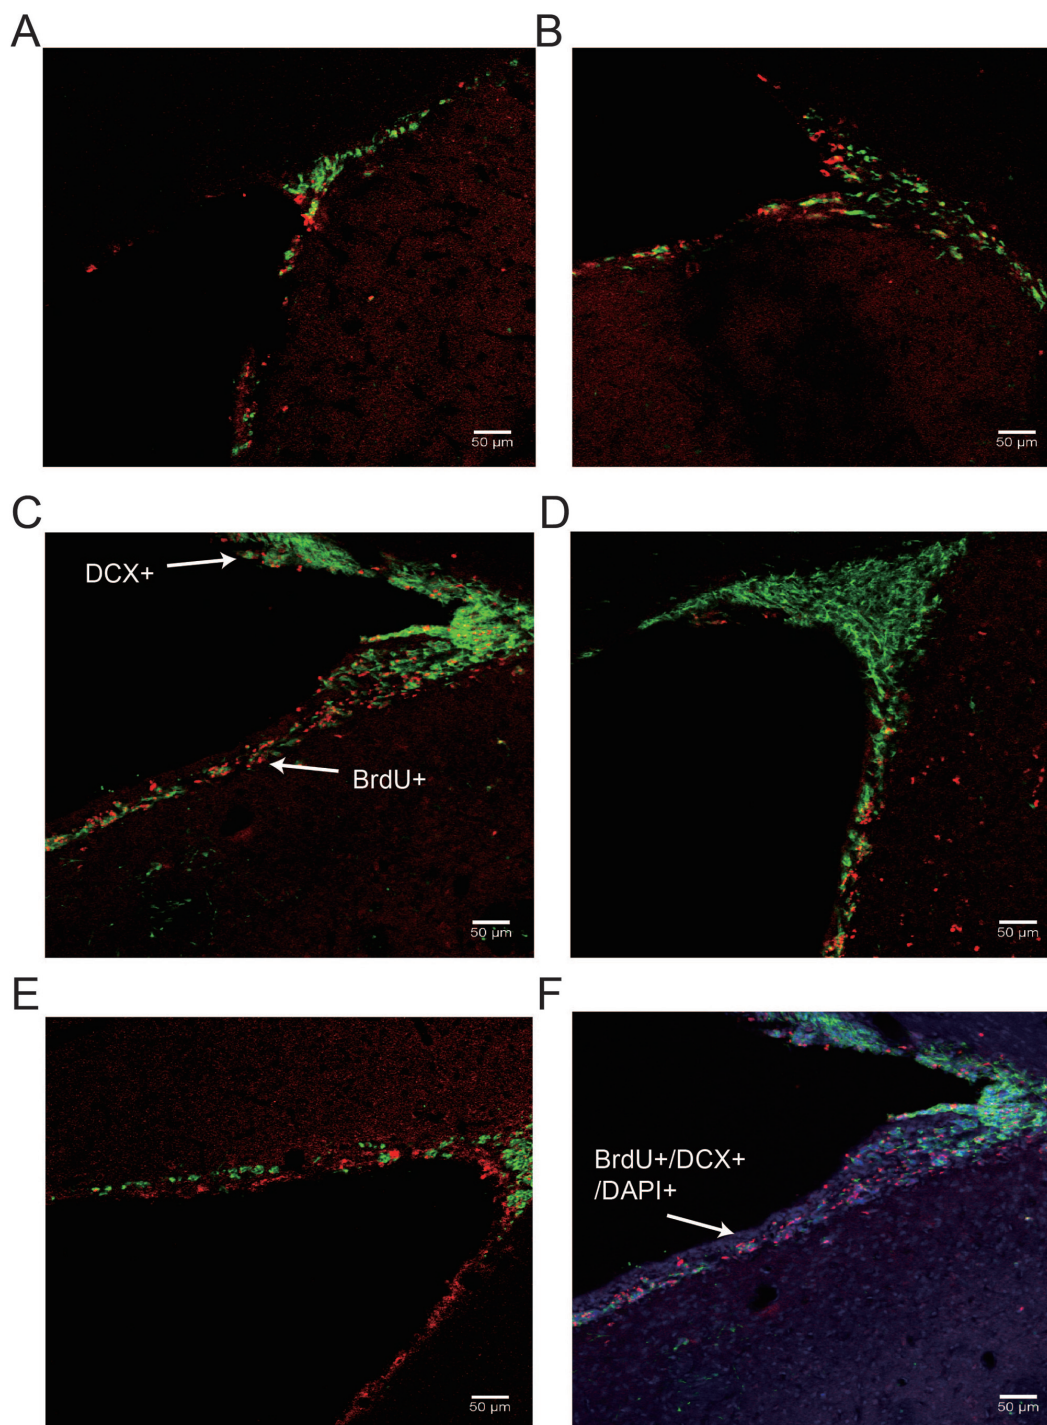

Supplement: Supplementary file 1 [file downloadSupplementary]
